# Supplementary material
Source: publisher site journal article supplement (https://www.dovepress.com/article/516425)
Supplement: Supplementary file 1 [file 516425%20Supplementary%20Tables.docx]

### ****Table S1.** Quality Assessment of Cohort Studies Using the Newcastle-Ottawa Scale**

| Domain | Item | Assessment Criteria[6] | Stars Allocated |
| --- | --- | --- | --- |
| **Selection** | 1. Representativeness of the Exposed Cohort | ① Truly represents the characteristics of the exposed group in the population*; ② Represents the characteristics of the exposed group in the population to a certain extent*; ③ Selects certain types of populations, such as nurses, volunteers; ④ No description of the source of the exposed group | ★ |
|  | 2. Selection of the Non-Exposed Cohort | ① Comes from the same population as the exposed group*; ② Comes from a different population from the exposed group; ③ No description of the source of the non-exposed group | ★ |
|  | 3. Ascertainment of Exposure | ① Fixed file records (such as surgical records)*; ② Uses structured interviews*; ③ Reports written by the research subjects themselves; ④ No description | ★ |
|  | 4. Demonstration That Outcome of Interest Was Not Present at Start | ① Yes*; ② No | ★ |
| **Comparability** | 1. Comparability of Cohorts on the Basis of the Design or Analysis | ① The study controls the most important confounding factors*; ② The study controls any other confounding factors* (this item can be revised to explain the control of the second most important factor) | ★★ |
| **Outcome** | 1. Assessment of Outcome | ① Blind independent evaluation*; ② There are file records*; ③ Self-report; ④ No description | ★ |
|  | 2. Was Follow-Up Long Enough for Outcomes to Occur | ① Yes (prescribing an appropriate follow-up time before evaluation)*; ② No | ★ |
|  | 3. Adequacy of Follow-Up of Cohorts | ① Complete follow-up*; ② A small number of research subjects are lost to follow-up but not enough to introduce bias (prescribing the loss-to-follow-up rate or describing the loss-to-follow-up situation)*; ③ There is loss to follow-up (prescribing the loss-to-follow-up rate) but no description; ④ No description of the follow-up situation | ★ |

**Note: *: Scoring points; Total Score: ★/9; Quality Rating: Low risk of bias: 7-9 stars; Moderate risk of bias: 4-6 stars; High risk of bias: 0-3 stars.**

**Table S2. Characteristics of the included studies in the meta-analysis**

| Study | Groups | Sample size, n | Males, n | Mean age, years | Duration of diabetes, years | Details of procedures | Follow-up duration |
| --- | --- | --- | --- | --- | --- | --- | --- |
| Cui et al. 2018[11] | Control | 20 | 9 | 55.28±5.16 | 28.76±5.27 | 0.5mg IVR 3-7 days before 23G PPV | 6 months |
| IVC | 20 | 13 | 60.74±2.63 | 24.25±6.33 | 0.5mg IVC 3-7 days before 23G PPV |
| Lu et al. 2019[14] | Control | 125 | 67 | 52.13±6.71 | - | 23G PPV without IVC | 24 months |
| IVR | 146 | 78 | 53.33±7.27 | - | 0.5mg IVR before 23G PPV |
| IVC | 157 | 84 | 51.44±8.33 | - | 0.5mg IVC 5-7 days before 23G PPV |
| Mao et al. 2018[15] | Control | 46 | 21 | 57.52±9.47 | 13.54±9.47 | 23G PPV without IVC | 3 months |
| IVC | 22 | 13 | 52.73±9.20 | 9.27±6.50 | 0.5mg IVC 3-7 days before 23G PPV |
| Ren et al. 2019[16] | Control | 25 | 14 | 62 (46-80) | 12.04±6.05 | 25G PPV without IVC | 6 months |
| IVC | 25 | 16 | 57 (28-69) | 10.36±4.17 | 0.5mg IVC immediately after 25G PPV |
| Su et al. 2016[17] | Control | 18 | - | - | - | 23G PPV without IVC | 3 months |
| IVC | 18 | - | - | - | 0.5mg IVC 7 days before 23G PPV |
| Xu et al. 2019[18] | Control | 21 | 10 | 51.9±8.3 | 7.0±4.0 | 23G PPV without IVC | 6 months |
| IVC | 16 | 7 | 50.1±10.1 | 8.8±5.0 | 0.5mg IVC 5-10 days before 23G PPV |
| Yang et al. 2016[10] | Control | 53 | 24 | 49.64±8.71 | 15.87±4.77 | 23G PPV without IVC | 3 months |
| IVC | 54 | 27 | 48.63±8.24 | 16.67±4.53 | 0.5mg IVC 3 days before 23G PPV |
| Yang et al. 2019[19] | Control | 42 | 21 | 51.5±13.3 | - | 0.5mg IVR 3-5 days before 23G PPV | 6 months |
| IVC | 37 | 19 | 49.7±12.2 | - | 0.5mg IVC 3-5 days before 23G PPV |
| Li et al. 2020[13] | Control | 20 | 9 | 56.0±10.5 | 14.0±6.8 | 23G PPV without IVC | - |
| IVC-A | 20 | 10 | 51.1±11.6 | 10.9±7.7 | 0.5mg IVC 7 days before 23G PPV |
| IVC-B | 20 | 13 | 53.1±10.0 | 11.8±6.9 | 0.5mg IVC 14 days before 23G PPV |
| Jiang et al. 2020[12] | Control | 15 | 10 | 53.5±9.59 | 9.88±8.52 | 25G PPV without IVC | 12 months |
| IVC | 15 | 6 | 55.54±9.94 | 13.19±8.08 | 0.5mg IVC after 25G PPV |
| Yang et al. 2023[25] | Control | 12 | 5 | 55.33±5.65 | 15.25±5.33 | 23G PPV without IVC | - |
| IVC | 12 | 2 | 44.50±11.77 | 11.94±7.35 | 0.5mg IVC 3-14 days before 23G PPV |
| Li et al. 2022[20] | Control | 44 | 22 | 54.50±9.23 | 8.50 (5.00, 11.00) | 0.5mg IVR 3-5 days before 25G PPV | 3 months |
| IVC | 46 | 20 | 54.28±10.61 | 8.50 (5.00, 11.75) | 0.5mg IVC 3-5 days before 25G PPV |
| Li et al. 2021[21] | Control | 38 | 16 | 51.89±9.21 | 10.22±3.26 | 27G PPV without IVC | 6 months |
| IVC | 39 | 20 | 52.14±8.45 | 9.88±2.71 | 0.5mg IVC 6-7 days before 27G PPV |
| Ou et al. 2021[23] | Control | 37 | 14 | 57.35±10.98 | 8.89±2.23 | 23G PPV without IVC | 3 months |
| IVC | 38 | 15 | 56.71±12.65 | 8.71±1.98 | 0.5mg IVC 5 days before 23G PPV |
| Luo et al. 2018[22] | Control | 16 | 7 | 57.68±11.29 | - | 23G PPV without IVC | 3 months |
| IVC | 15 | 5 | 57.00±13.14 | - | 0.5mg IVC 7 days before 23G PPV |
| Sun et al. 2015[24] | Control | 28 | 18 | 57.36±3.3 | 10±1.3 | 23G PPV without IVC | 6 months |
| IVR | 28 | 19 | 52.58±2.7 | 10±1.7 | 0.5mg IVR 3-5 days before 23G PPV |
| IVC | 28 | 18 | 51.22±3.2 | 10±1.4 | 0.5mg IVC 3-5 days before 23G PPV |

**Note: IVC: intravitreal Conbercept; PPV: pars plana vitrectomy; IVR: intravitreal Ranibizumab.**
